# Supplementary material
Source: MDPI journal article supplement (https://www.mdpi.com/2073-4344/12/1/59)
Supplement: s1 [file s1]

## Supporting Information

### **Highly efficient and ambient-temperature synthesis of benzimidazoles via Co(III)/Co(II)-mediated redox catalysis**

Ren-Yuan Zhong, Wu-Lin Xiong, Hao-Yuan Zhang, Tong-Tong Zeng, Shan-Shan Gong\* and Qi Sun\*

*Jiangxi Key Laboratory of Organic Chemistry, Jiangxi Science and Technology Normal University, 605 Fenglin Avenue, Nanchang, Jiangxi 330013, PR China*

E-mail: gongshanshan@jxstnu.edu.cn; sunqi@jxstnu.edu.cn

#### Table of contents

|                                                                                                                                                    |          |
|----------------------------------------------------------------------------------------------------------------------------------------------------|----------|
| <b>Figure S1.</b> UV-Vis absorption change of Co(acac) <sub>3</sub> upon addition to benzaldehyde and <i>N</i> -phenyl- <i>o</i> -phenylenediamine | Page S2  |
| <b>Figure S2.</b> <sup>1</sup> H NMR spectrum of <b>12</b>                                                                                         | Page S3  |
| <b>Figure S3.</b> <sup>13</sup> C NMR spectrum of <b>12</b>                                                                                        | Page S3  |
| <b>Figure S4.</b> <sup>19</sup> F NMR spectrum of <b>12</b>                                                                                        | Page S4  |
| <b>Figure S5.</b> <sup>1</sup> H NMR spectrum of <b>13</b>                                                                                         | Page S4  |
| <b>Figure S6.</b> <sup>13</sup> C NMR spectrum of <b>13</b>                                                                                        | Page S5  |
| <b>Figure S7.</b> <sup>19</sup> F NMR spectrum of <b>13</b>                                                                                        | Page S5  |
| <b>Figure S8.</b> <sup>1</sup> H NMR spectrum of <b>15</b>                                                                                         | Page S6  |
| <b>Figure S9.</b> <sup>13</sup> C NMR spectrum of <b>15</b>                                                                                        | Page S6  |
| <b>Figure S10.</b> <sup>1</sup> H NMR spectrum of <b>17</b>                                                                                        | Page S7  |
| <b>Figure S11.</b> <sup>13</sup> C NMR spectrum of <b>17</b>                                                                                       | Page S7  |
| <b>Figure S12.</b> <sup>19</sup> F NMR spectrum of <b>17</b>                                                                                       | Page S8  |
| <b>Figure S13.</b> <sup>1</sup> H NMR spectrum of <b>18</b>                                                                                        | Page S8  |
| <b>Figure S14.</b> <sup>13</sup> C NMR spectrum of <b>18</b>                                                                                       | Page S9  |
| <b>Figure S15.</b> <sup>19</sup> F NMR spectrum of <b>18</b>                                                                                       | Page S9  |
| <b>Figure S16.</b> <sup>1</sup> H NMR spectrum of <b>23</b>                                                                                        | Page S10 |
| <b>Figure S17.</b> <sup>13</sup> C NMR spectrum of <b>23</b>                                                                                       | Page S10 |
| <b>Figure S18.</b> <sup>1</sup> H NMR spectrum of <b>24</b>                                                                                        | Page S11 |
| <b>Figure S19.</b> <sup>13</sup> C NMR spectrum of <b>24</b>                                                                                       | Page S11 |

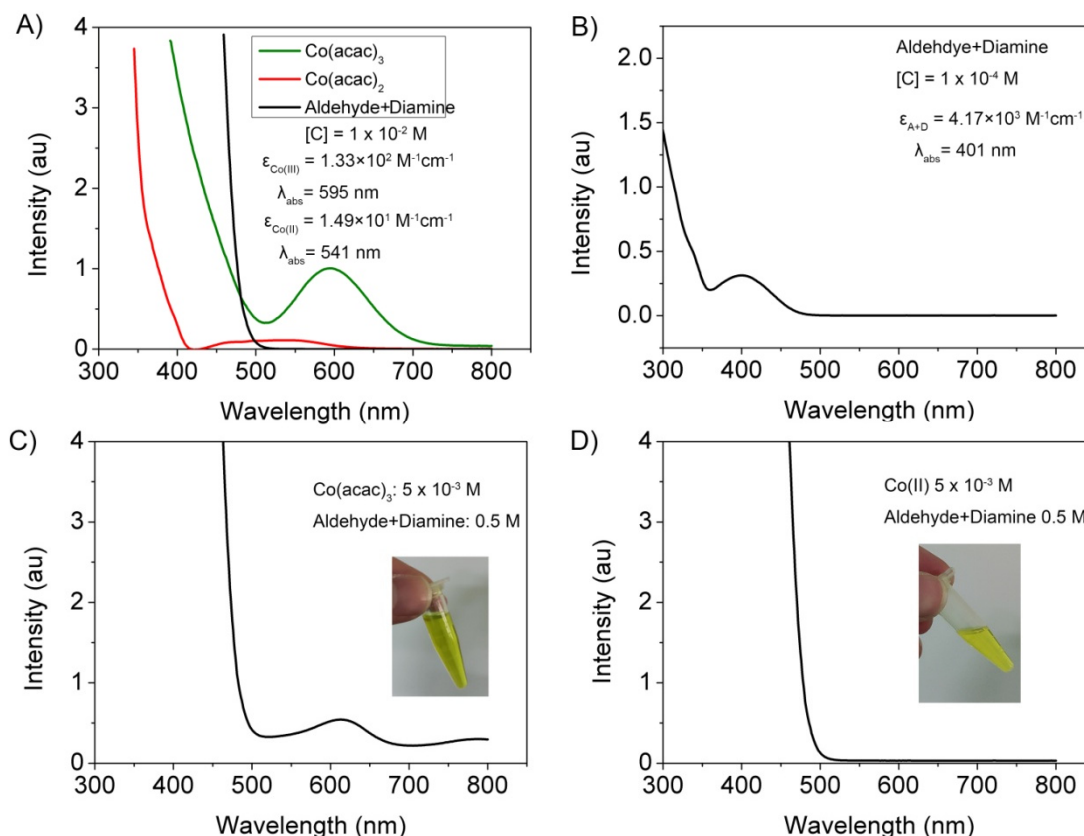

**Note:** The UV-Vis absorptions of  $\text{Co}(\text{acac})_2$ ,  $\text{Co}(\text{acac})_3$ , and the mixture of 1.05 mmol of benzaldehyde and 1.0 mmol of *N*-phenyl-*o*-phenylenediamine (15 min after mixing) in  $\text{CH}_2\text{Cl}_2$  (obtained at  $10^{-2}$  M) indicated that the molar extinction coefficient of  $\text{Co}(\text{acac})_3$  is low ( $\epsilon = 1.33 \times 10^2 \text{ M}^{-1}\text{cm}^{-1}$ ,  $\lambda_{\text{abs,max}} = 595 \text{ nm}$ ), while that of  $\text{Co}(\text{acac})_2$  is even lower ( $\epsilon = 1.49 \times 10^1 \text{ M}^{-1}\text{cm}^{-1}$ ,  $\lambda_{\text{abs,max}} = 541 \text{ nm}$ ) (Figure S1A). These results are in agreement with their faint colors in Figure 1C ( $4 \times 10^{-3}$  M in  $\text{CH}_2\text{Cl}_2$ ). Meanwhile, the absorption of the mixture of benzaldehyde and *N*-phenyl-*o*-phenylenediamine (obtained at  $10^{-4}$  M) is much higher ( $\epsilon = 4.17 \times 10^3 \text{ M}^{-1}\text{cm}^{-1}$ ,  $\lambda_{\text{abs,max}} = 401 \text{ nm}$ ) (Figure S1B).

$[\text{Co}(\text{acac})_3]$  (0.01 eq.) for UV-Vis absorption monitoring was set at  $5 \times 10^{-3}$  M ( $[\text{Aldehyde+Diamine}] = 0.5 \text{ M}$ ). The absorption data clearly showed the peak of Co(III) at  $\sim 600 \text{ nm}$  when  $\text{Co}(\text{acac})_3$  was initially added to the mixture (Figure S1C). After the green color faded quickly, the signal at  $\sim 600 \text{ nm}$  disappeared completely (Figure S1D). This result is in agreement with the color change observed in both glass vial and TLC plate (Figure 1). But the very small molar extinction coefficient made the observation of Co(II) very hard.

**Figure S1.** UV-Vis absorption change of  $\text{Co}(\text{acac})_3$  upon addition to benzaldehyde and *N*-phenyl-*o*-phenylenediamine: The UV-Vis absorptions of  $\text{Co}(\text{acac})_2$ ,  $\text{Co}(\text{acac})_3$ , and Aldehyde+Diamine mixture at  $10^{-2}$  M (A), Aldehyde+Diamine mixture at  $10^{-4}$  M (B), Aldehyde+Diamine mixture upon addition of 0.01 eq. of  $\text{Co}(\text{acac})_3$  (C), and after the green color of Aldehyde+Diamine mixture with  $\text{Co}(\text{acac})_3$  faded (D).

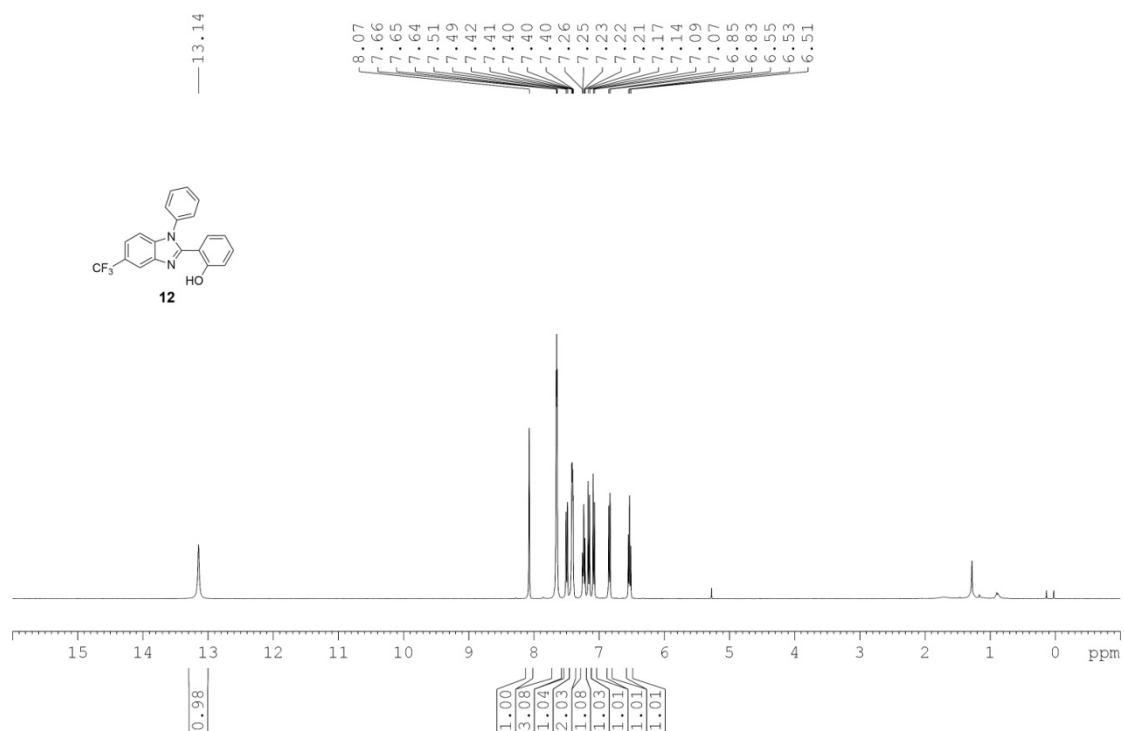

**Figure S2.** <sup>1</sup>H NMR spectrum of **12**

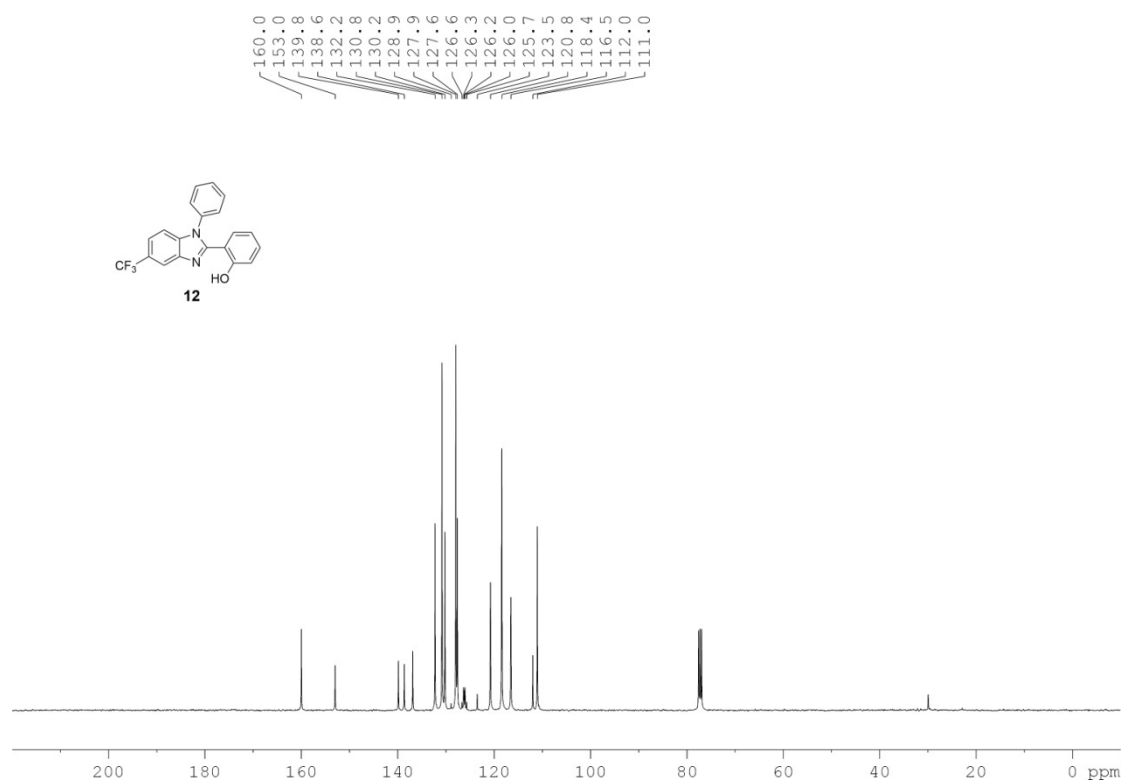

**Figure S3.** <sup>13</sup>C NMR spectrum of **12**

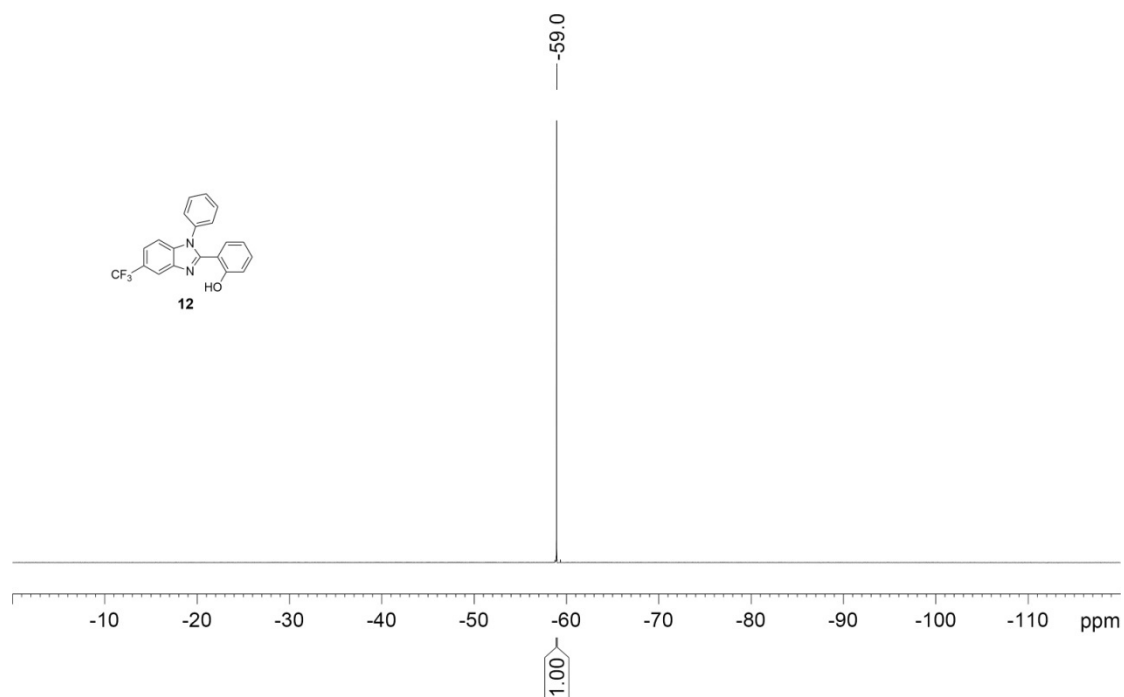

**Figure S4.** <sup>19</sup>F NMR spectrum of **12**

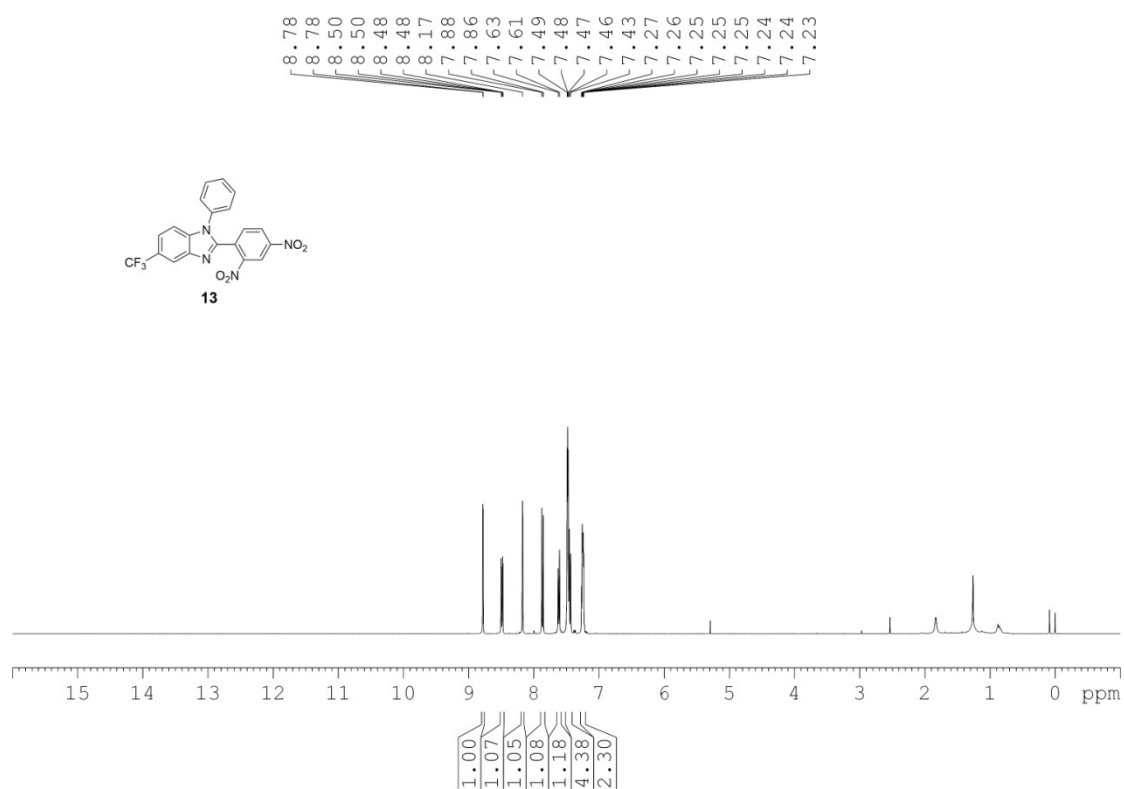

**Figure S5.** <sup>1</sup>H NMR spectrum of **13**

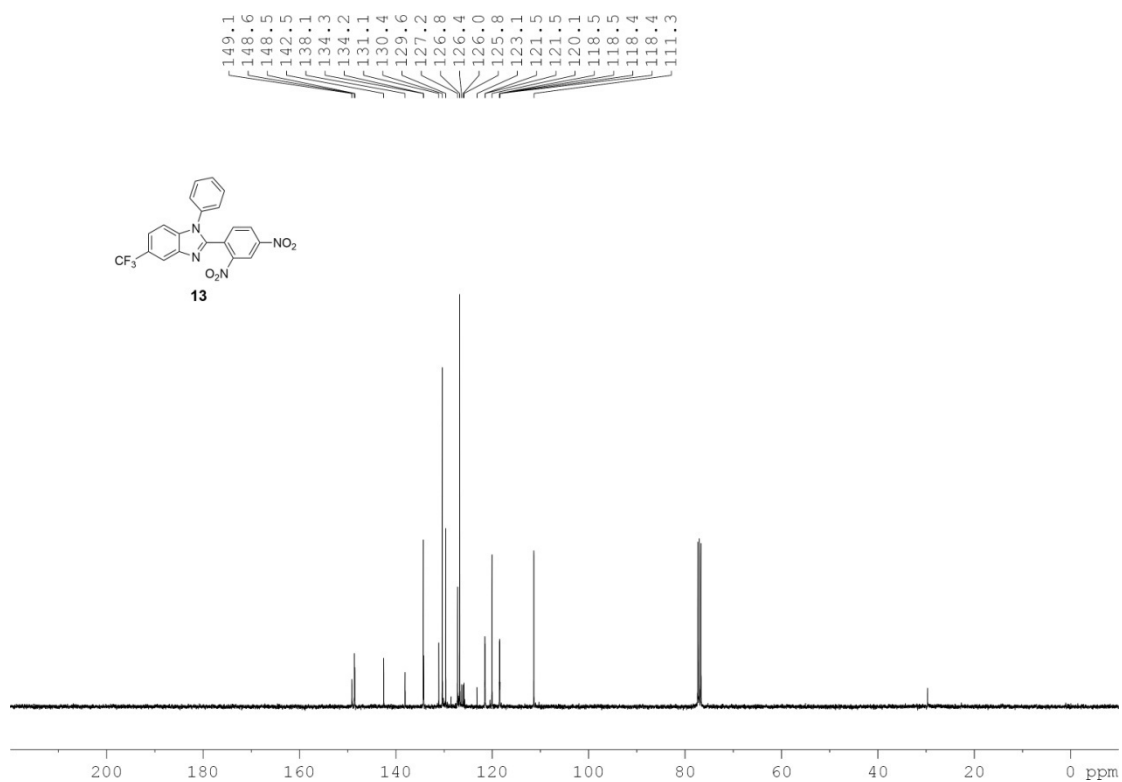

**Figure S6.** <sup>13</sup>C NMR spectrum of **13**

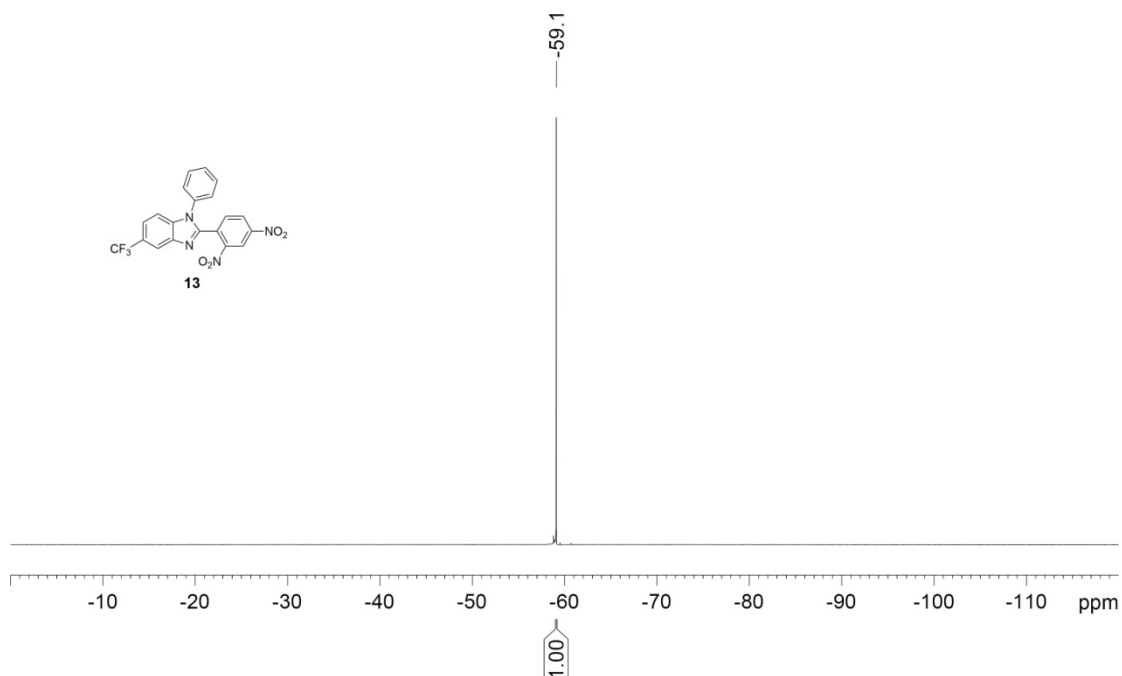

**Figure S7.** <sup>19</sup>F NMR spectrum of **13**

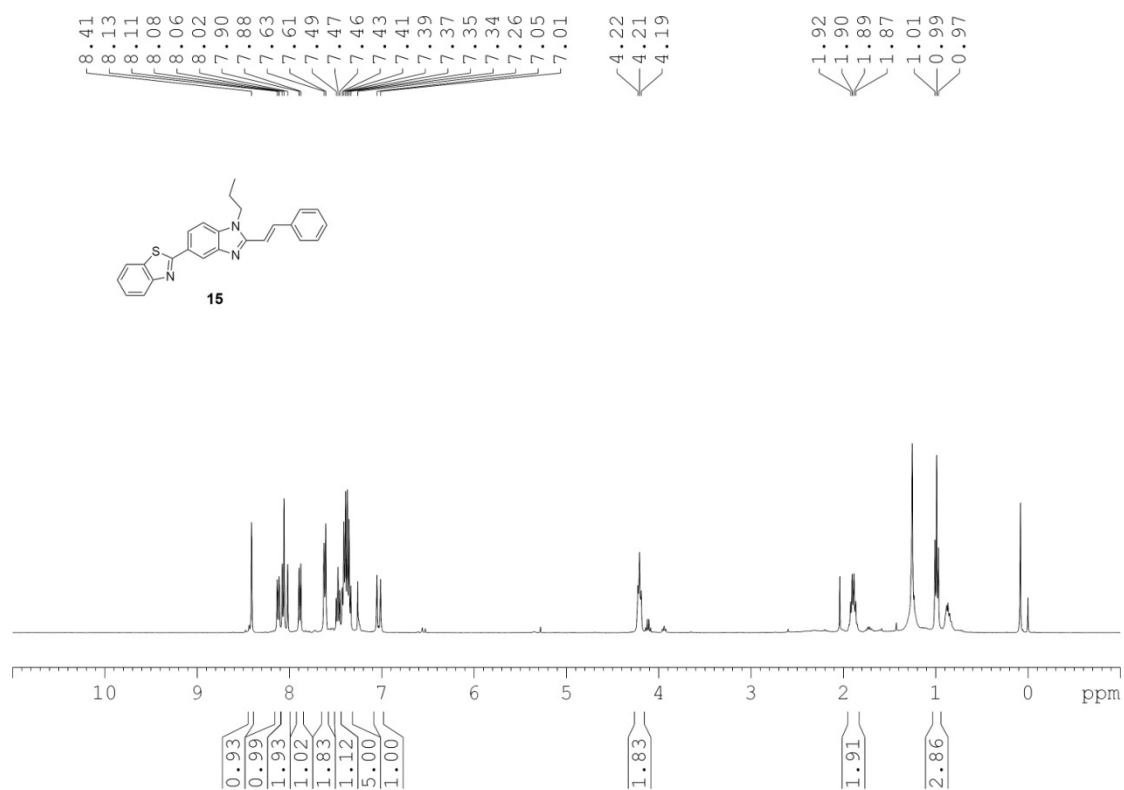

**Figure S8.** <sup>1</sup>H NMR spectrum of **15**

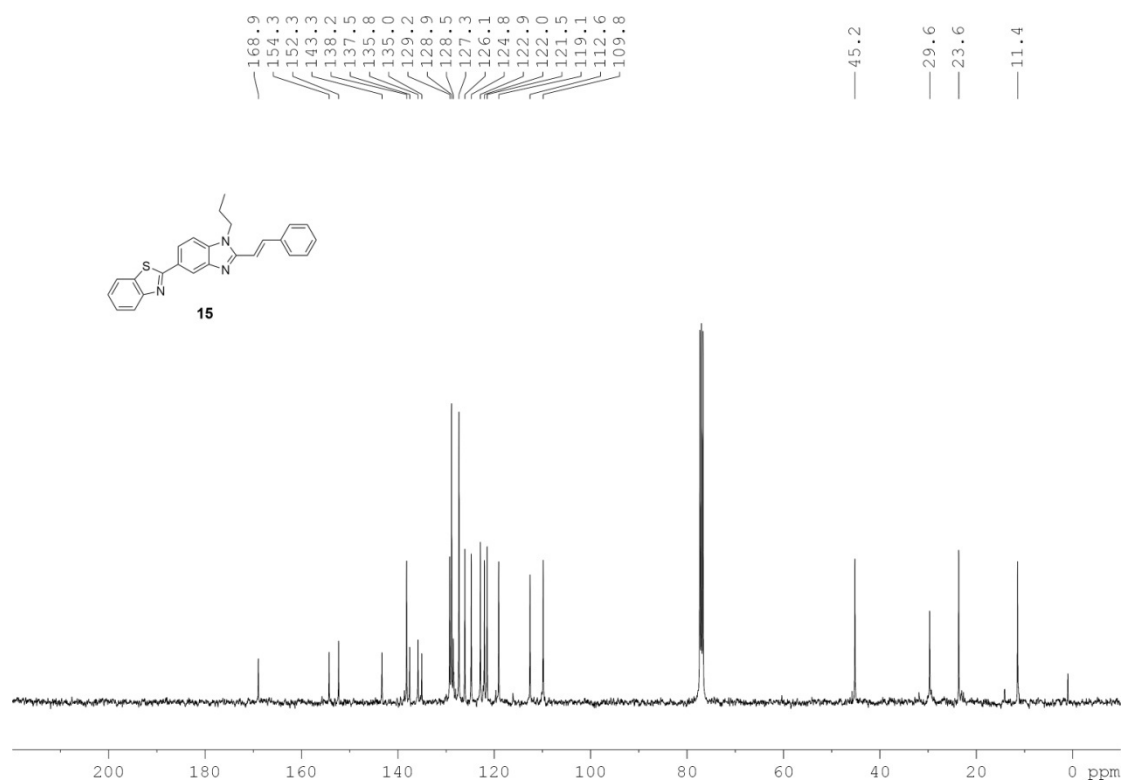

**Figure S9.** <sup>13</sup>C NMR spectrum of **15**

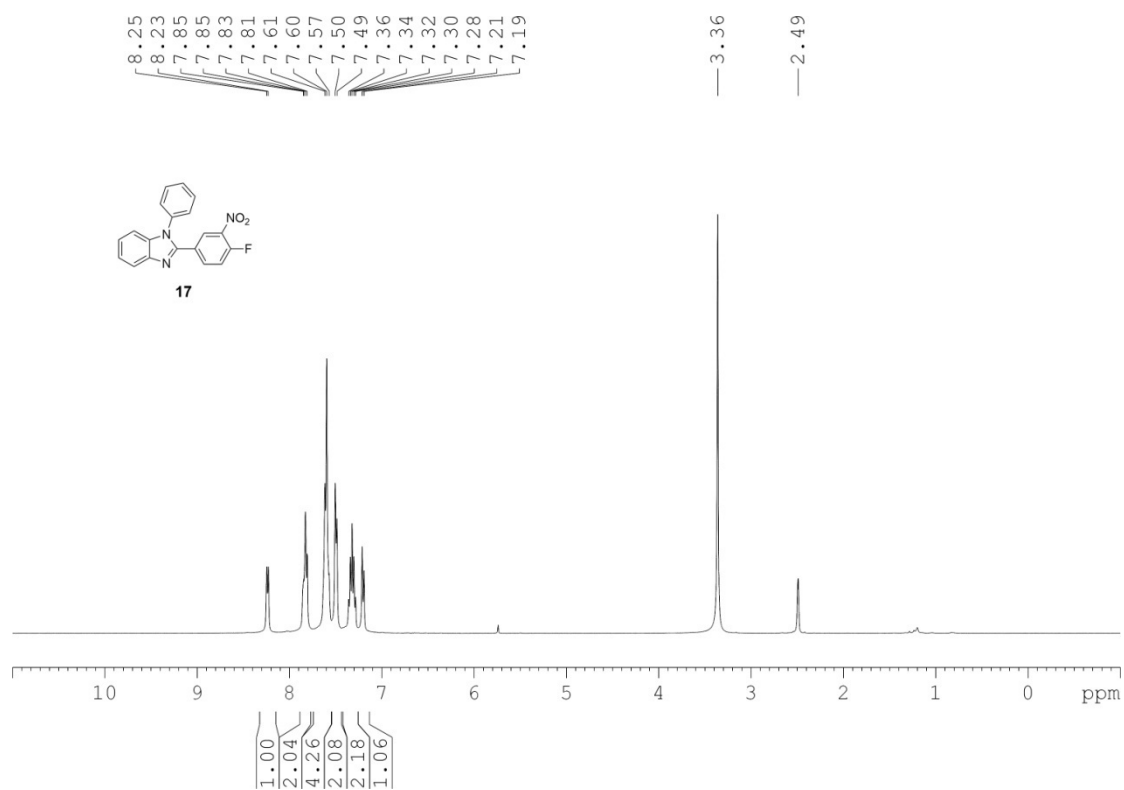

**Figure S10.** <sup>1</sup>H NMR spectrum of **17**

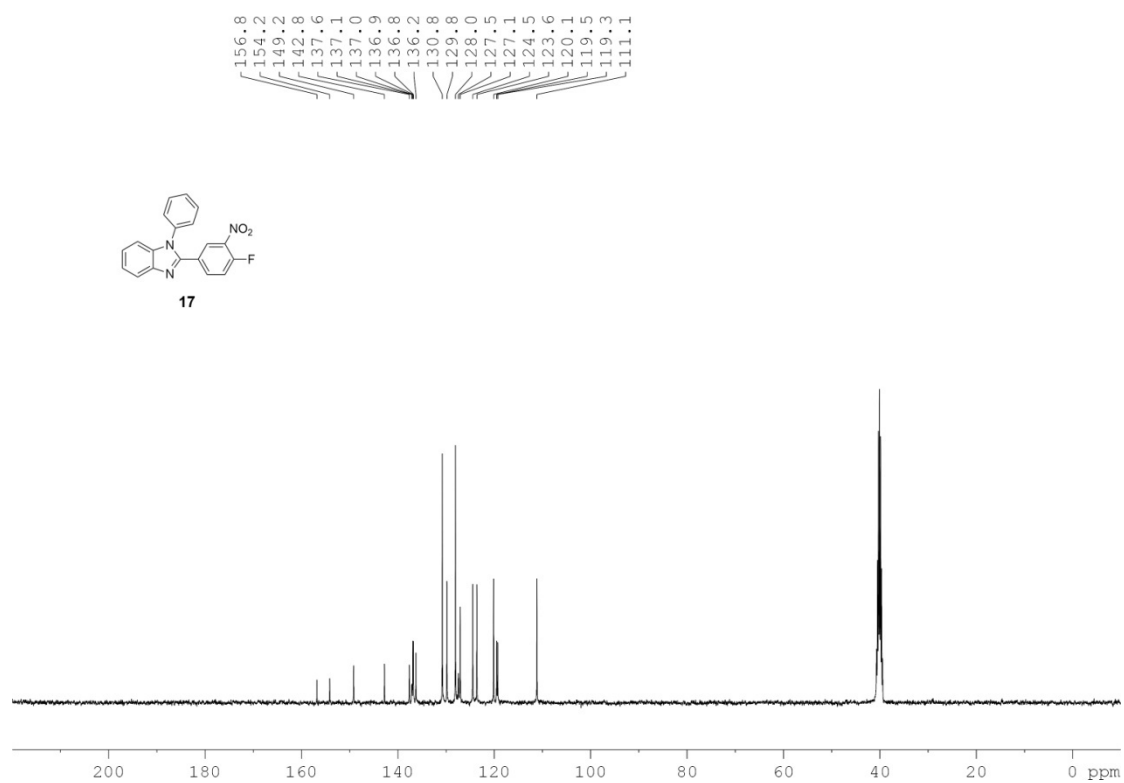

**Figure S11.** <sup>13</sup>C NMR spectrum of **17**

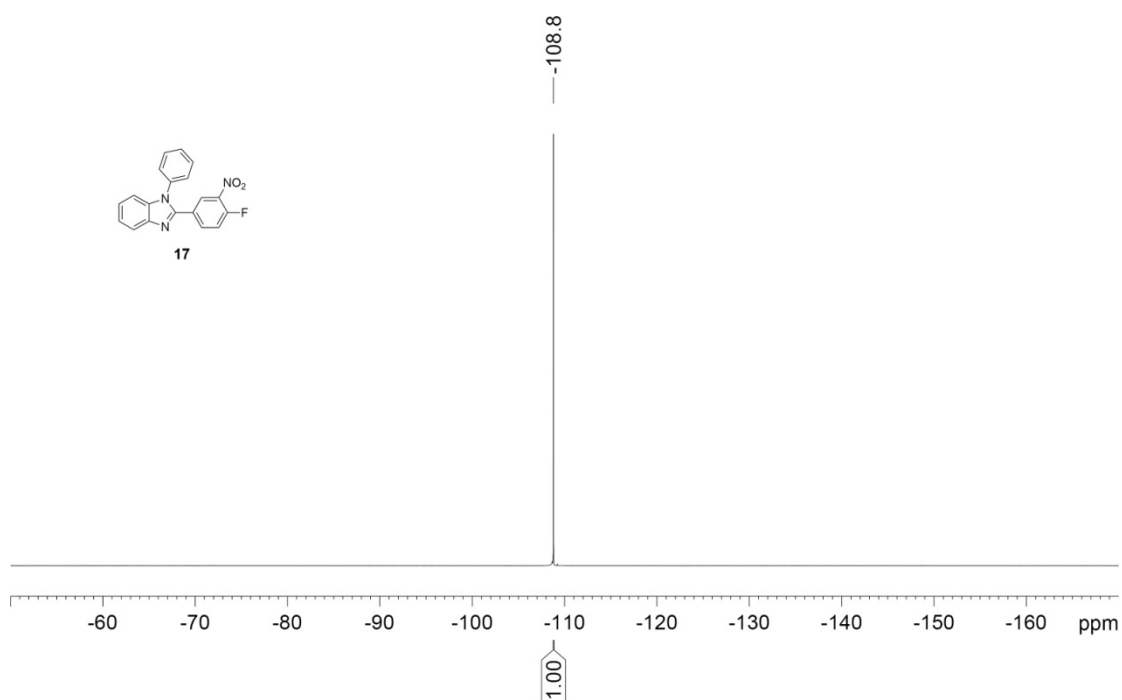

**Figure S12.** <sup>19</sup>F NMR spectrum of **17**

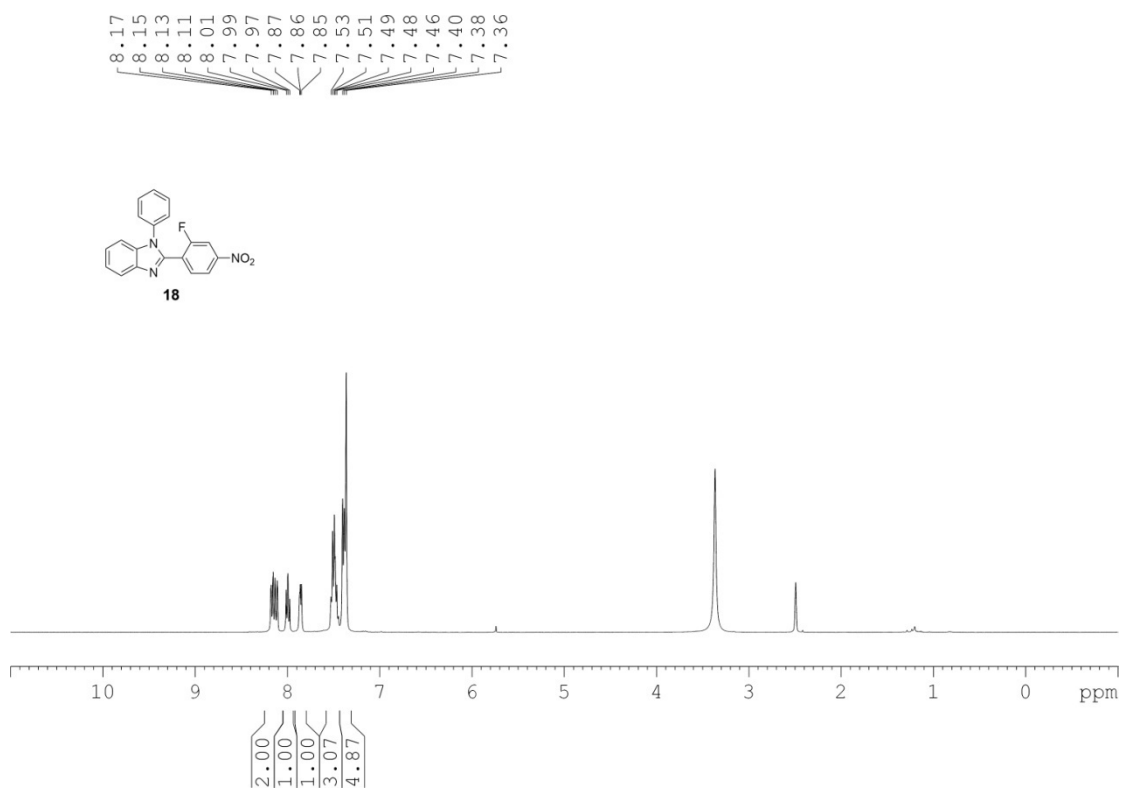

**Figure S13.** <sup>1</sup>H NMR spectrum of **18**



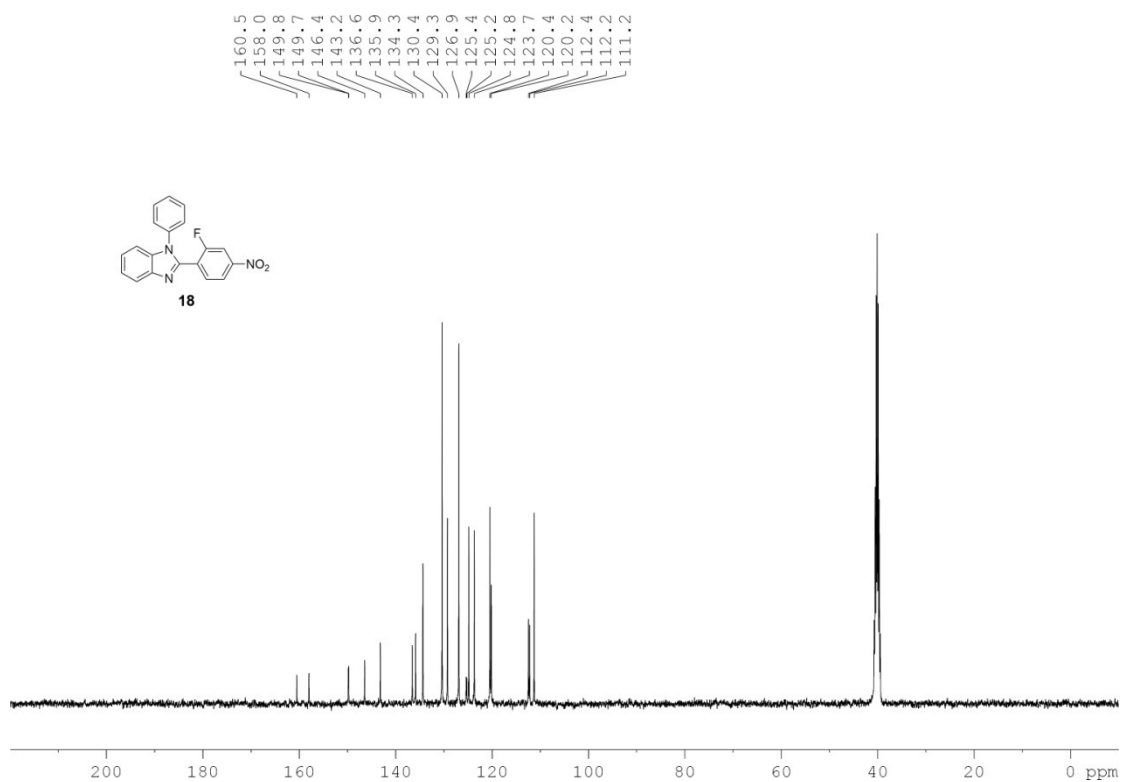

**Figure S14.** <sup>13</sup>C NMR spectrum of **18**

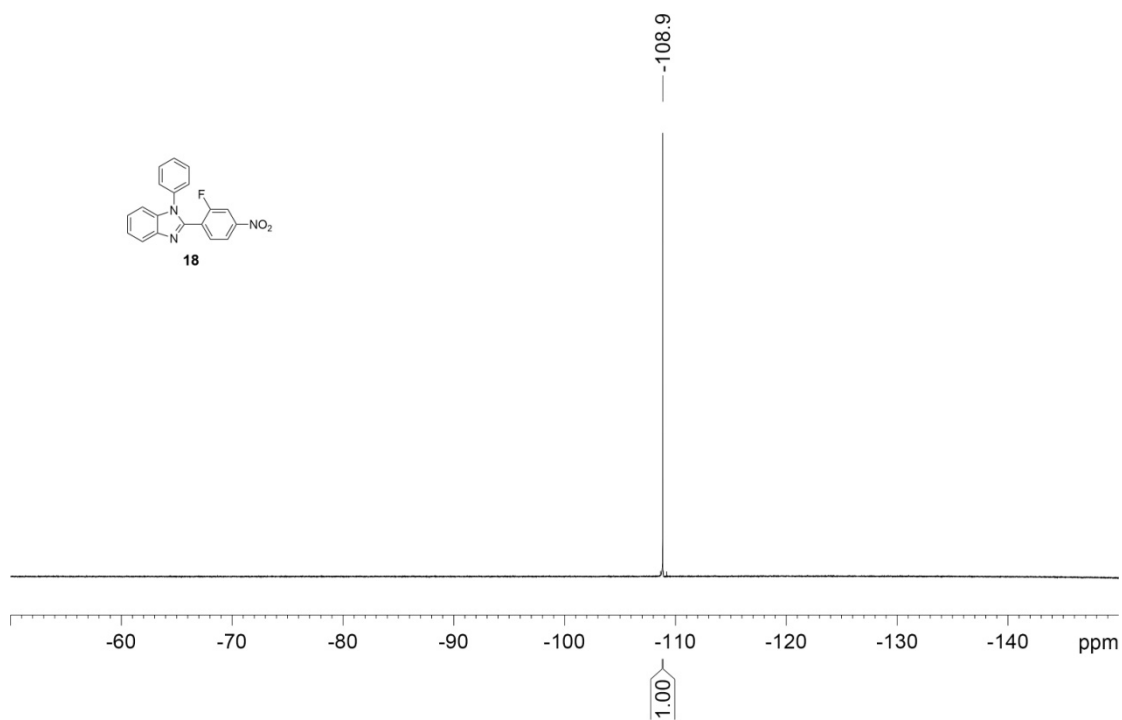

**Figure S15.** <sup>19</sup>F NMR spectrum of **18**

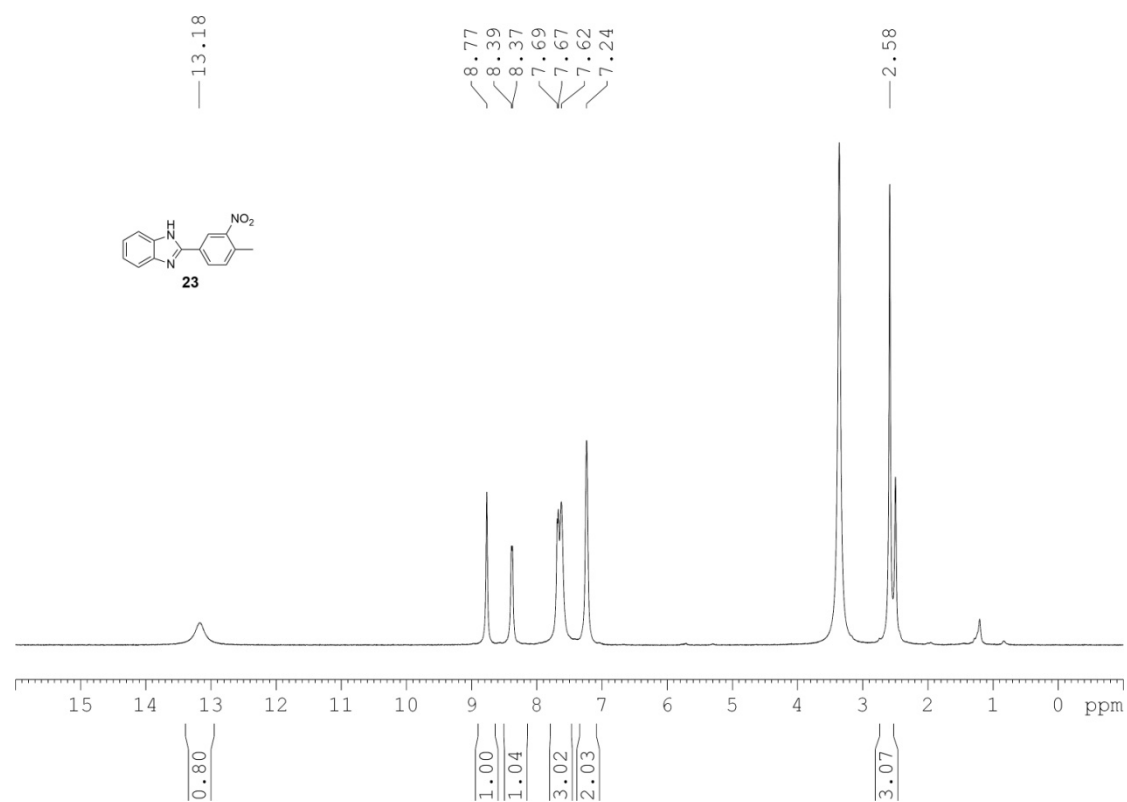

**Figure S16.** <sup>1</sup>H NMR spectrum of **23**

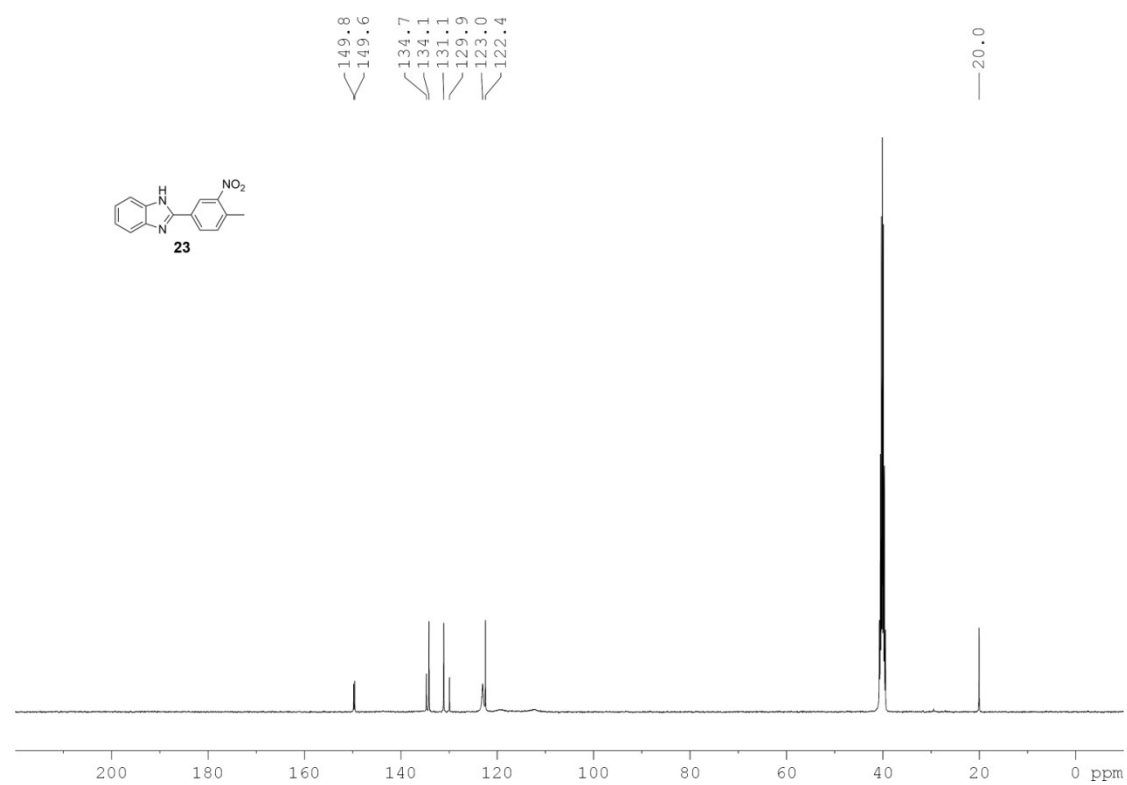

**Figure S17.** <sup>13</sup>C NMR spectrum of **23**

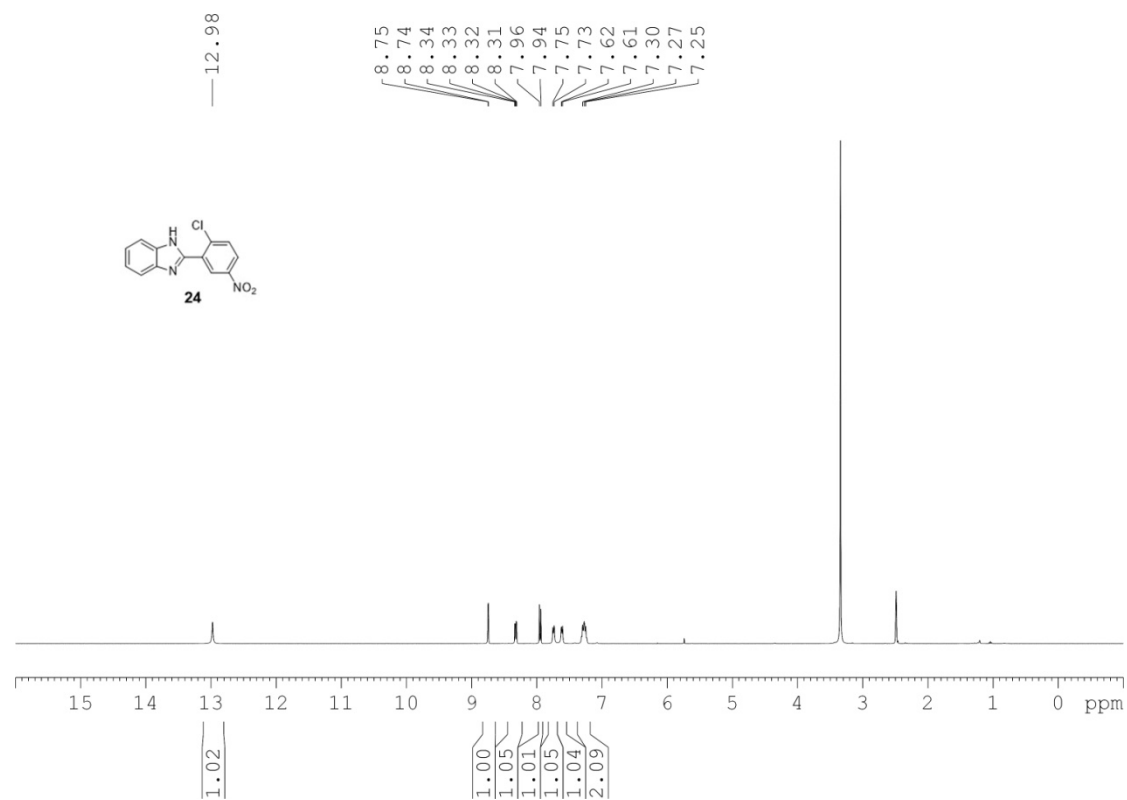

**Figure S18.** <sup>1</sup>H NMR spectrum of **24**

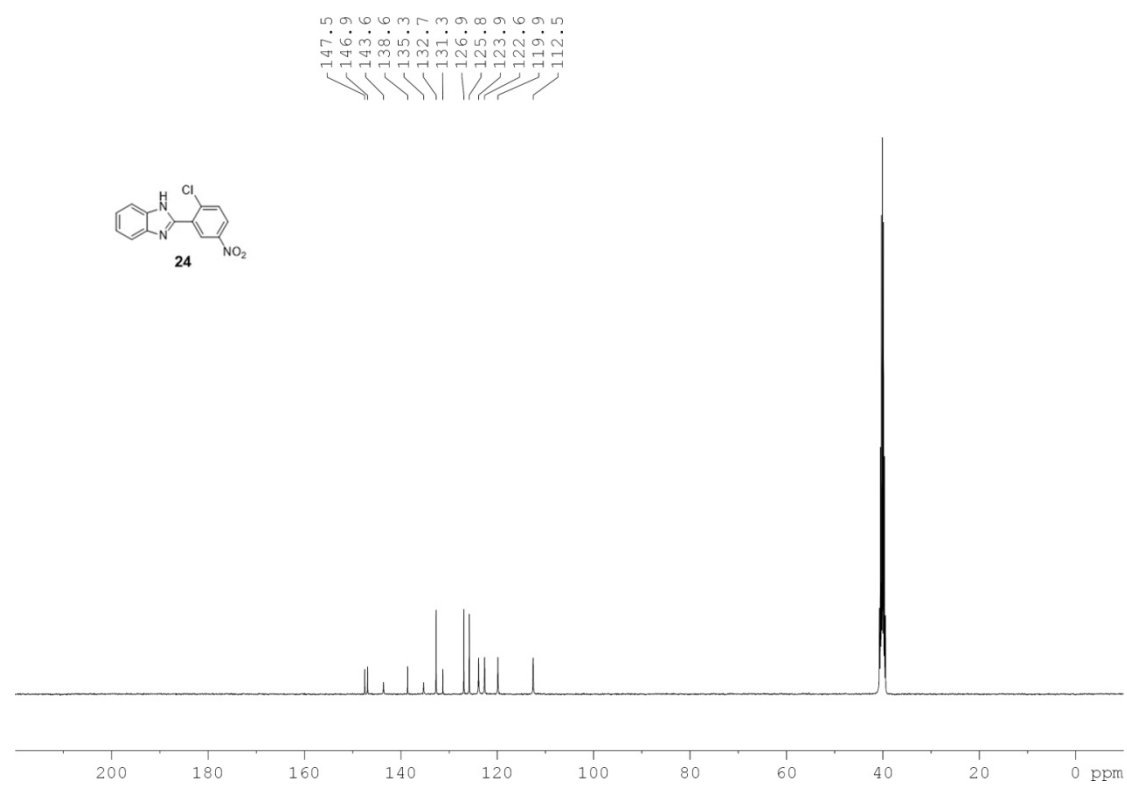

**Figure S19.** <sup>13</sup>C NMR spectrum of **24**
